# Supplementary material for: Knockdown of CXCL5 inhibits the invasion, metastasis and stemness of bladder cancer lung metastatic cells by downregulating CD44
Source: PubMed Central journal article supplement — Anticancer Drugs. 2021 Aug 16;33(1):e103–12. doi: 10.1097/CAD.0000000000001153 (PMC8670357; doi:10.1097/cad.0000000000001153), 2021-08-16

**Supplemental Fig. 1: CXCL5/CXCR2 regulates CD44 to affect EMT and CSC characteristics of T24-L cells by activating the AKT/NFκB pathway.** The p-AKT, t-AKT, p-NFκB, t-NFκB and CD44 proteins in the shCon and shCXCL5 groups with or without SB225002 and processed in advance were detected by Western blot, and GAPDH was used as the loading control. The quantitative results are shown on the right side, \*p<0.05 versus control group.

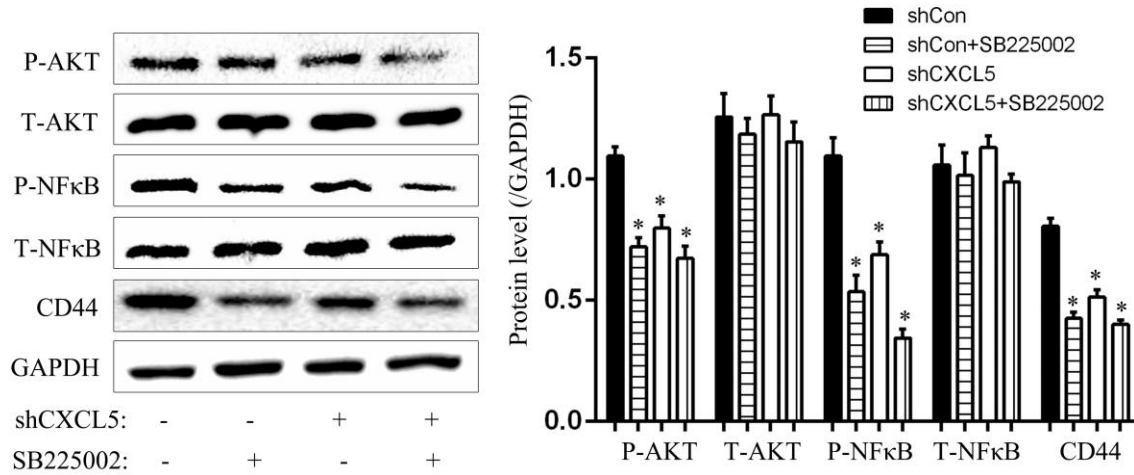

Supplement: acd-33-e103-s001.pdf [file acd-33-e103-s001.pdf]
